# Supplementary material
Source: HighWire-hosted journal article supplement (https://gut.bmj.com/content/71/5/961)

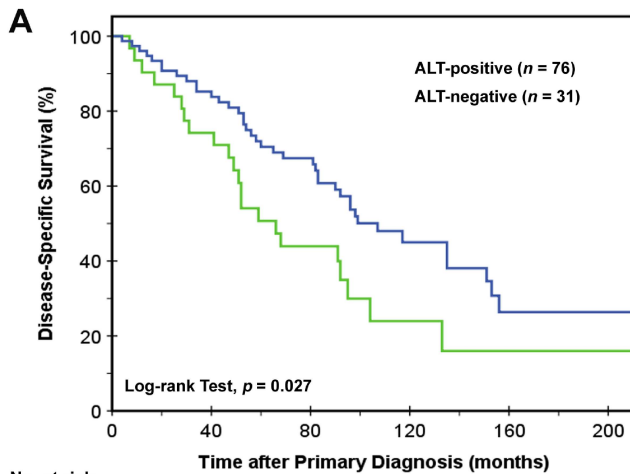

| No. at risk  | 0  | 40 | 80 | 120 | 160 | 200 |
|--------------|----|----|----|-----|-----|-----|
| ALT-pos.: 76 | 76 | 60 | 41 | 15  | 5   | 2   |
| ALT-neg.: 31 | 31 | 23 | 12 | 4   | 2   | 1   |

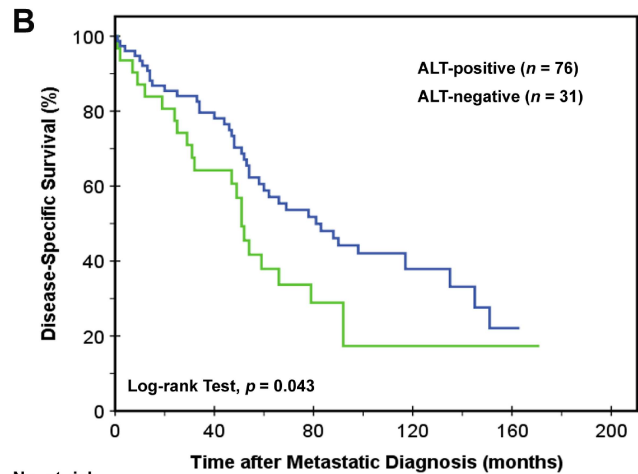

| No. at risk  | 0  | 40 | 80 | 120 | 160 | 200 |
|--------------|----|----|----|-----|-----|-----|
| ALT-pos.: 76 | 76 | 52 | 28 | 9   | 1   | 0   |
| ALT-neg.: 31 | 31 | 19 | 6  | 2   | 1   | 0   |

Supplement: inline-supplementary-material-5 [file inline-supplementary-material-5.pdf]

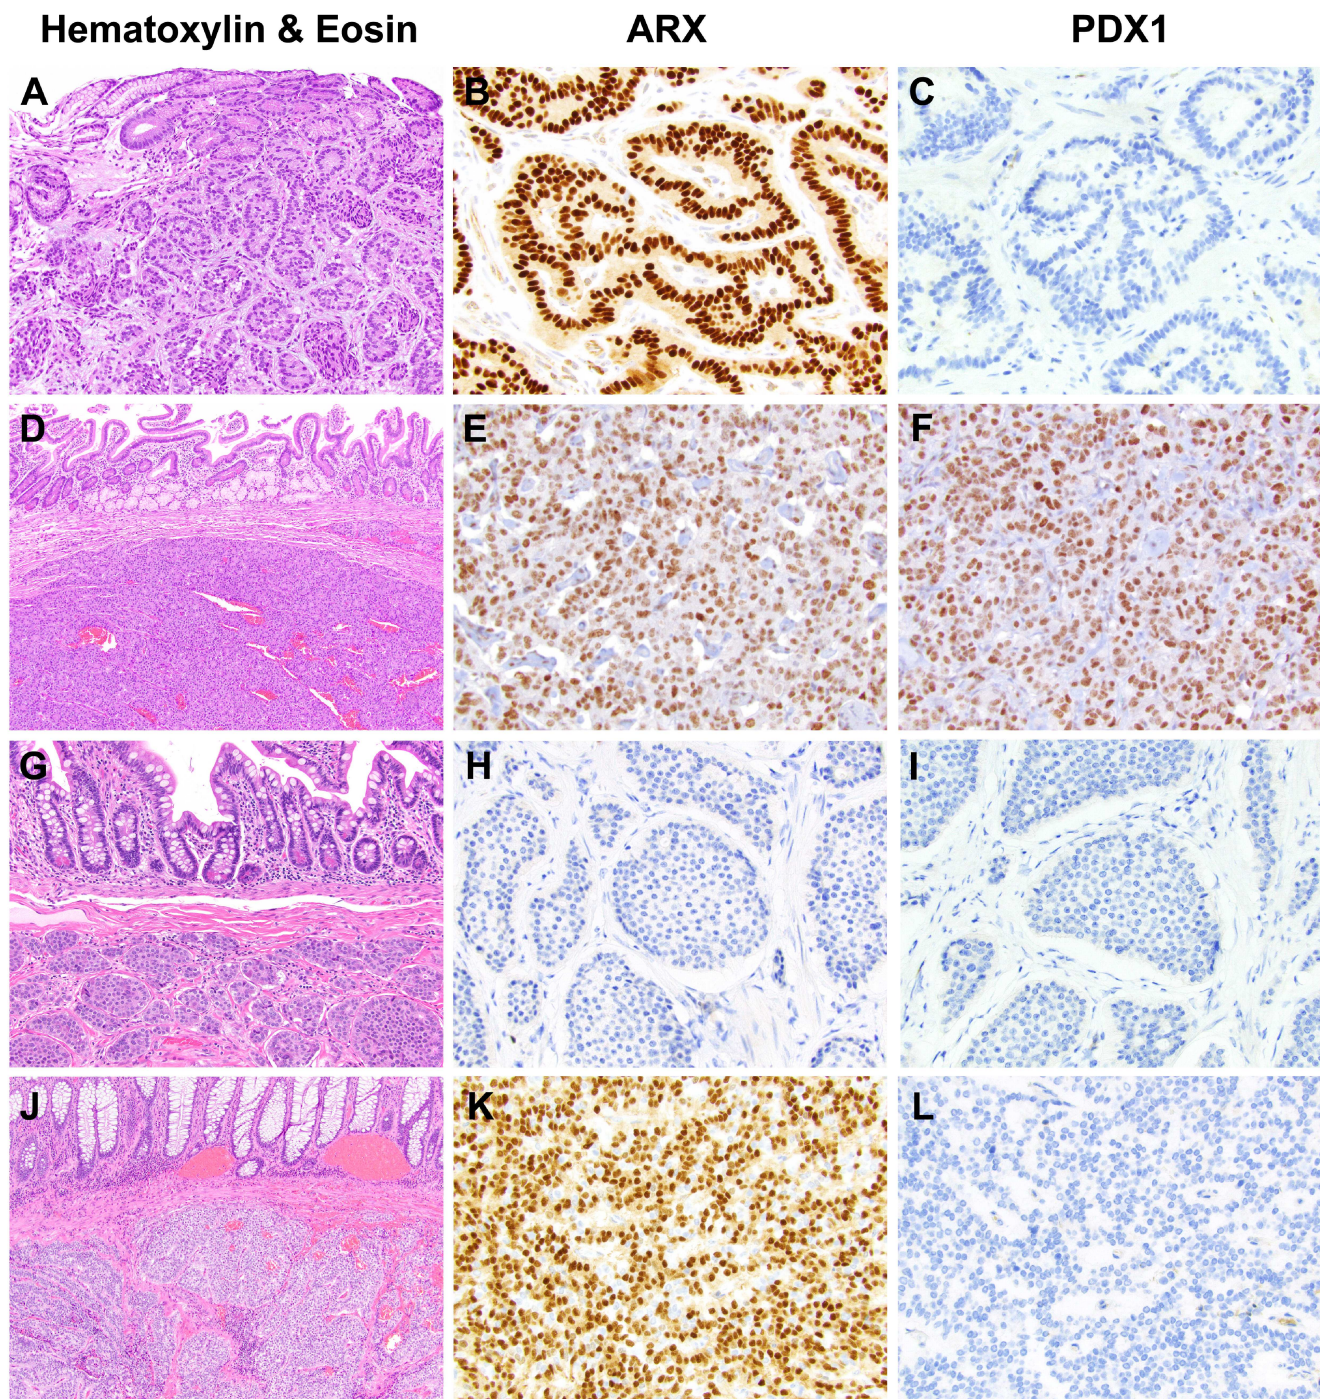

Supplement: inline-supplementary-material-6 [file inline-supplementary-material-6.pdf]

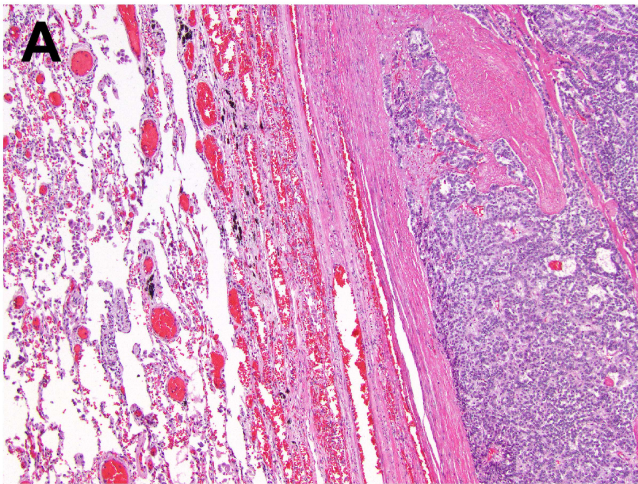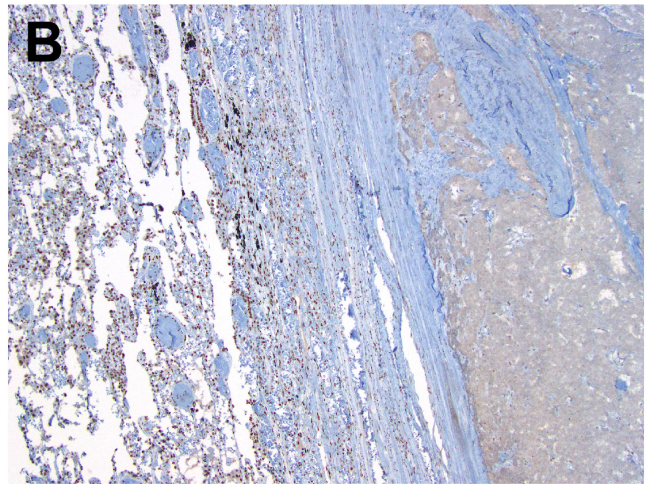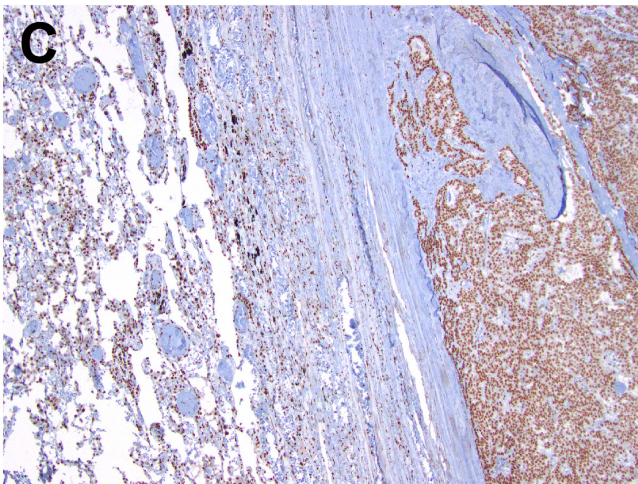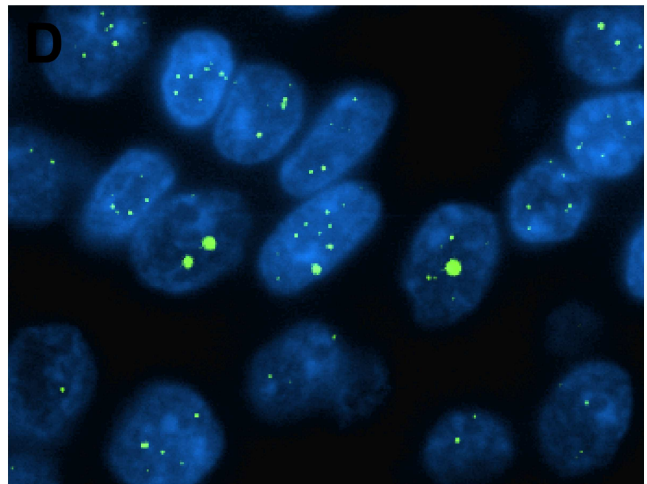

Supplement: inline-supplementary-material-7 [file inline-supplementary-material-7.pdf]
